# Supplementary material for: Real-Time Support of Pediatric Diabetes Self-Care by a Transport Team
Source: Oxford University Press journal article supplement (doi:10.2337/dc13-1041), 2013-08-20

## SUPPLEMENTARY DATA

**Supplementary Figure 1.** Transfer Center protocols. Rule of 15 is to give 15 g carbohydrate snack, and re-check in 15 min; repeat until blood glucose >80 mg/dL. Sick day insulin dosing is 10% of total daily dose, given as short-acting insulin every 2 h, so long as moderate to large ketones persist.

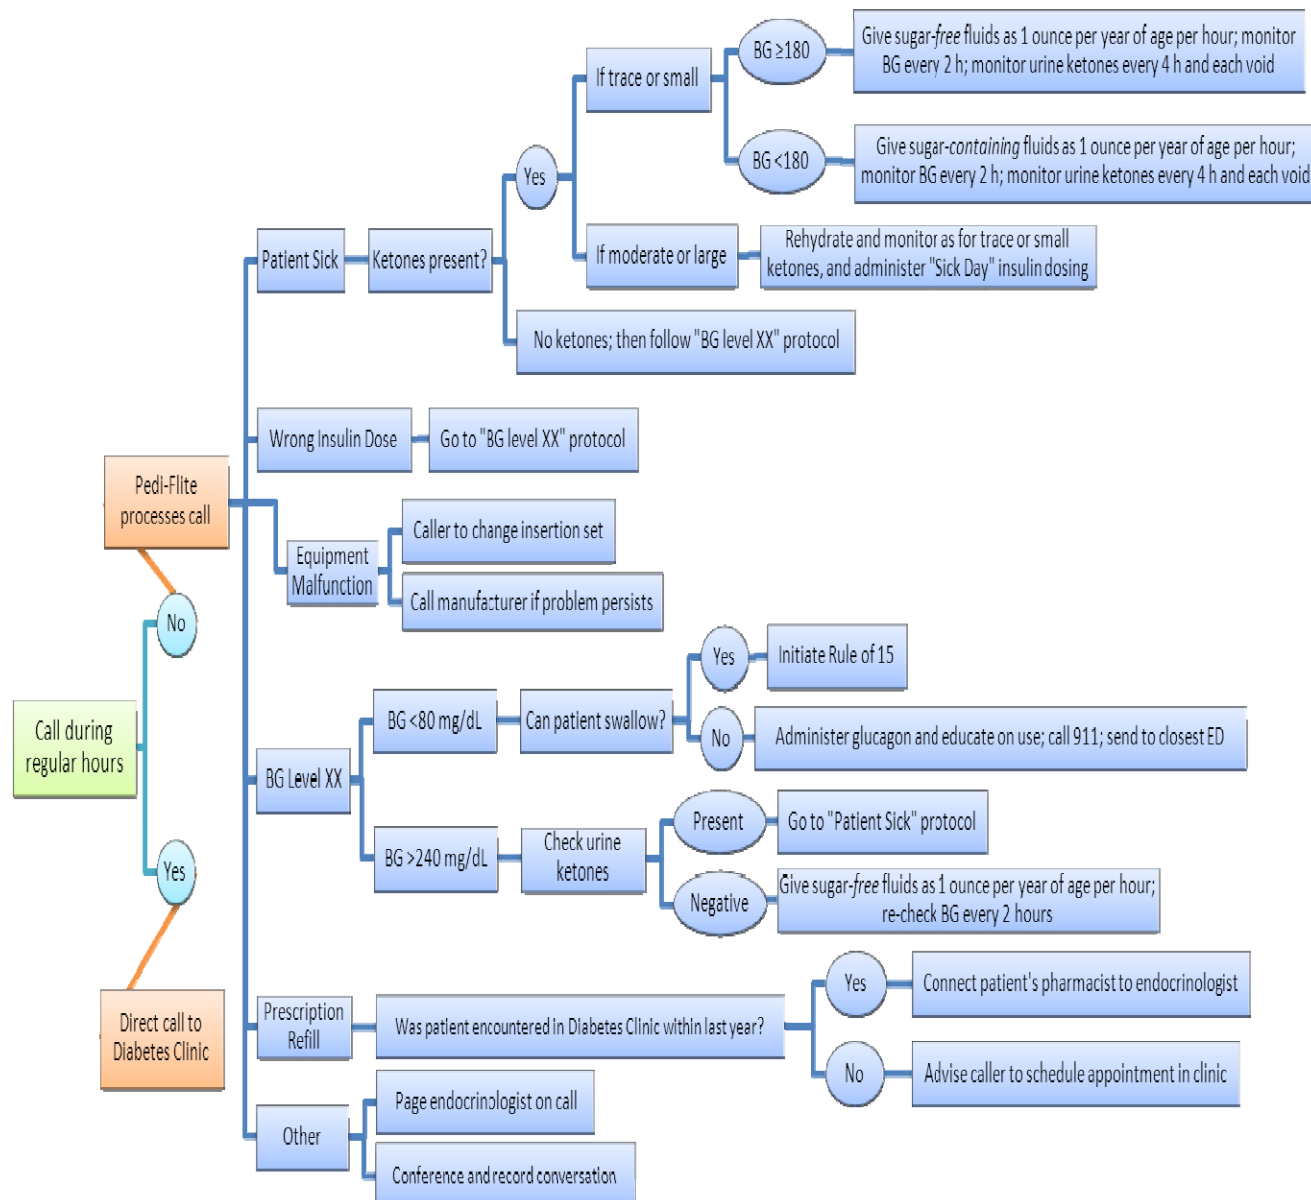

Supplement: dc131041supplementarydata.pdf [file dc131041supplementarydata.pdf]
